# Supplementary material for: Comparative analysis of RNA 3D structure prediction methods: towards enhanced modeling of RNA–ligand interactions
Source: PubMed Central journal article supplement — Nucleic Acids Res. 2024 Jun 25;52(13):7465–86. doi: 10.1093/nar/gkae541 (PMC11260495; doi:10.1093/nar/gkae541), 2024-06-25
Supplement: gkae541_supplemental_file.pdf [file gkae541_supplemental_file.pdf]

**Supplementary Material**  
**for**

**Comparative analysis of RNA 3D structure prediction methods: towards enhanced modeling of RNA-Ligand interactions**

Chandran Nithin<sup>1,2\*</sup>, Sebastian Kmiecik<sup>2</sup>, Roman Błaszczuk<sup>1</sup>, Julita Nowicka<sup>1</sup>, Irina Tuszyńska<sup>1</sup>

<sup>1</sup>Molecure SA, 02-089 Warsaw, Poland

<sup>2</sup>Laboratory of Computational Biology, Biological and Chemical Research Center, Faculty of Chemistry, University of Warsaw, 02-089 Warsaw, Poland.

\*To whom correspondence should be addressed: [n.chandran@molecure.com](mailto:n.chandran@molecure.com), [n.chandran@cnbc.uw.edu.pl](mailto:n.chandran@cnbc.uw.edu.pl), [i.tuszynska@molecure.com](mailto:i.tuszynska@molecure.com)

**Supplementary Table S1: Dataset of RNA structures for benchmarking.**

| PDB ID | Length | Length range | Structure Class* | Type of MWJ† | Class     |
|--------|--------|--------------|------------------|--------------|-----------|
| 1AJU   | 30     | 1-30         | Simple HP        |              | Simple    |
| 1ARJ   | 29     | 1-30         | Simple HP        |              | Simple    |
| 1BYJ   | 27     | 1-30         | Simple HP        |              | Simple    |
| 1EHT   | 33     | 31-60        | Simple HP        |              | Simple    |
| 1EI2   | 25     | 1-30         | Simple HP        |              | Simple    |
| 1F1T   | 38     | 31-60        | Simple HP        |              | Simple    |
| 1FMN   | 35     | 31-60        | Simple HP        |              | Simple    |
| 1FYP   | 27     | 1-30         | Simple HP        |              | Simple    |
| 1LVJ   | 31     | 31-60        | Simple HP        |              | Simple    |
| 1NBK   | 34     | 31-60        | Simple HP        |              | Simple    |
| 1NEM   | 23     | 1-30         | Simple HP        |              | Simple    |
| 1QD3   | 29     | 1-30         | Simple HP        |              | Simple    |
| 1RAW   | 36     | 31-60        | Simple HP        |              | Simple    |
| 1TOB   | 27     | 1-30         | Simple HP        |              | Simple    |
| 1Y26   | 71     | 61-90        | MWJ+PK           | 3WJ          | Difficult |
| 1Y27   | 68     | 61-90        | MWJ+PK           | 3WJ          | Difficult |
| 2AU4   | 41     | 31-60        | Simple HP        |              | Simple    |
| 2B57   | 65     | 61-90        | MWJ+PK           | 4WJ          | Difficult |
| 2CKY   | 77     | 61-90        | MWJ              | 3WJ          | Moderate  |
| 2EES   | 67     | 61-90        | MWJ+PK           | 4WJ          | Difficult |
| 2EET   | 67     | 61-90        | MWJ+PK           | 4WJ          | Difficult |
| 2EEU   | 67     | 61-90        | MWJ+PK           | 4WJ          | Difficult |
| 2EEV   | 67     | 61-90        | MWJ+PK           | 4WJ          | Difficult |
| 2EEW   | 67     | 61-90        | MWJ+PK           | 4WJ          | Difficult |
| 2G9C   | 67     | 61-90        | MWJ+PK           | 4WJ          | Difficult |
| 2GDI   | 80     | 61-90        | Simple HP        |              | Simple    |
| 2HOJ   | 79     | 61-90        | Simple HP        |              | Simple    |
| 2HOK   | 78     | 61-90        | Simple HP        |              | Simple    |
| 2HOM   | 80     | 61-90        | Simple HP        |              | Simple    |
| 2HOO   | 83     | 61-90        | Simple HP        |              | Simple    |
| 2HOP   | 76     | 61-90        | Simple HP        |              | Simple    |
| 2JUK   | 22     | 1-30         | Simple HP        |              | Simple    |
| 2KTZ   | 38     | 31-60        | Simple HP        |              | Simple    |
| 2KX8   | 42     | 31-60        | Simple HP        |              | Simple    |
| 2KXM   | 27     | 1-30         | Simple HP        |              | Simple    |
| 2L1V   | 36     | 31-60        | HP+PK            |              | Moderate  |
| 2L94   | 45     | 31-60        | Simple HP        |              | Simple    |
| 2LWK   | 32     | 31-60        | Simple HP        |              | Simple    |
| 2MIY   | 59     | 31-60        | HP+PK            |              | Moderate  |
| 2TOB   | 20     | 1-30         | Simple HP        |              | Simple    |
| 2XO1   | 65     | 61-90        | MWJ+PK           | 4WJ          | Difficult |
| 3D0U   | 161    | 151-180      | MWJ+PK           | 5WJ          | Difficult |

|      |     |         |           |         |           |
|------|-----|---------|-----------|---------|-----------|
| 3DIG | 174 | 151-180 | MWJ+PK    | 5WJ     | Difficult |
| 3DS7 | 67  | 61-90   | MWJ+PK    | 4WJ     | Difficult |
| 3E5E | 53  | 31-60   | MWJ       | 3WJ     | Moderate  |
| 3F2Q | 112 | 91-120  | MWJ+PK    | 4WJ     | Difficult |
| 3FO4 | 63  | 61-90   | MWJ+PK    | 4WJ     | Difficult |
| 3FO6 | 67  | 61-90   | MWJ+PK    | 4WJ     | Difficult |
| 3FU2 | 34  | 31-60   | HP+PK     |         | Moderate  |
| 3GCA | 33  | 31-60   | HP+PK     |         | Moderate  |
| 3GOG | 65  | 61-90   | MWJ+PK    | 4WJ     | Difficult |
| 3GX2 | 94  | 91-120  | MWJ+PK    | 4WJ     | Difficult |
| 3K1V | 34  | 31-60   | HP+PK     |         | Moderate  |
| 3LA5 | 71  | 61-90   | MWJ+PK    | 4WJ     | Difficult |
| 3NPN | 54  | 31-60   | MWJ+PK    | 3WJ     | Difficult |
| 3NPQ | 54  | 31-60   | MWJ+PK    | 3WJ     | Difficult |
| 3OWI | 88  | 61-90   | MWJ       | 3WJ     | Moderate  |
| 3Q3Z | 75  | 61-90   | HP+PK     |         | Moderate  |
| 3RKF | 67  | 61-90   | MWJ+PK    | 4WJ     | Difficult |
| 3SD3 | 89  | 61-90   | MWJ+PK    | 3WJ     | Difficult |
| 3SKL | 66  | 61-90   | MWJ+PK    | 4WJ     | Difficult |
| 3SKZ | 68  | 61-90   | MWJ+PK    | 4WJ     | Difficult |
| 3SUH | 101 | 91-120  | MWJ+PK    | 3WJ     | Difficult |
| 4FEJ | 67  | 61-90   | MWJ+PK    | 4WJ     | Difficult |
| 4FEL | 67  | 61-90   | MWJ+PK    | 4WJ     | Difficult |
| 4FEN | 67  | 61-90   | MWJ+PK    | 4WJ     | Difficult |
| 4FEO | 67  | 61-90   | MWJ+PK    | 4WJ     | Difficult |
| 4FEP | 67  | 61-90   | MWJ+PK    | 4WJ     | Difficult |
| 4FRG | 84  | 61-90   | MWJ+PK    | 4WJ     | Difficult |
| 4FRN | 102 | 91-120  | MWJ+PK    | 5WJ     | Difficult |
| 4GMA | 210 | 181-210 | MWJ+PK    | 4WJ+3WJ | Difficult |
| 4GXY | 172 | 151-180 | MWJ+PK    | 4WJ+3WJ | Difficult |
| 4JF2 | 77  | 61-90   | HP+PK     |         | Moderate  |
| 4L81 | 96  | 91-120  | MWJ+PK    | 4WJ     | Difficult |
| 4LVV | 89  | 61-90   | MWJ+PK    | 3WJ     | Difficult |
| 4LX5 | 71  | 61-90   | MWJ+PK    | 4WJ     | Difficult |
| 4QK8 | 122 | 121-150 | MWJ+PK    | 3WJ     | Difficult |
| 4QK9 | 124 | 121-150 | MWJ+PK    | 3WJ     | Difficult |
| 4QLM | 125 | 121-150 | MWJ+PK    | 3WJ     | Difficult |
| 4RZD | 101 | 91-120  | MWJ+PK    | 3WJ     | Difficult |
| 4TZX | 71  | 61-90   | MWJ+PK    | 4WJ     | Difficult |
| 4XW7 | 64  | 61-90   | Simple HP |         | Simple    |
| 4Y1M | 107 | 91-120  | MWJ       | 4WJ     | Moderate  |
| 4YAZ | 84  | 61-90   | MWJ+PK    | 3WJ     | Difficult |
| 4YB0 | 83  | 61-90   | MWJ+PK    | 3WJ     | Difficult |
| 4ZNP | 73  | 61-90   | HP+PK     |         | Moderate  |
| 5BTP | 75  | 61-90   | HP+PK     |         | Moderate  |

|      |     |         |           |         |           |
|------|-----|---------|-----------|---------|-----------|
| 5D5L | 77  | 61-90   | HP+PK     |         | Moderate  |
| 5KPY | 71  | 61-90   | MWJ+PK    | 3WJ     | Difficult |
| 5LWJ | 34  | 31-60   | HP+PK     |         | Moderate  |
| 5NEF | 18  | 1-30    | Simple HP |         | Simple    |
| 5NWQ | 41  | 31-60   | HP+PK     |         | Moderate  |
| 5NZ6 | 41  | 31-60   | HP+PK     |         | Moderate  |
| 5OB3 | 69  | 61-90   | Simple HP |         | Simple    |
| 5T83 | 95  | 91-120  | HP+PK     |         | Moderate  |
| 5U3G | 85  | 61-90   | MWJ+PK    | 3WJ     | Difficult |
| 5V3F | 31  | 31-60   | Simple HP |         | Simple    |
| 6C63 | 36  | 31-60   | Simple HP |         | Simple    |
| 6C65 | 36  | 31-60   | Simple HP |         | Simple    |
| 6CC3 | 101 | 91-120  | MWJ       | 4WJ     | Moderate  |
| 6CK4 | 117 | 91-120  | MWJ       | 4WJ     | Moderate  |
| 6CK5 | 117 | 91-120  | MWJ+PK    | 4WJ     | Difficult |
| 6E81 | 36  | 31-60   | HP+G4     |         | Difficult |
| 6E82 | 36  | 31-60   | HP+G4     |         | Difficult |
| 6E8S | 38  | 31-60   | HP+G4     |         | Difficult |
| 6E8T | 36  | 31-60   | HP+G4     |         | Difficult |
| 6E8U | 37  | 31-60   | HP+G4     |         | Difficult |
| 6GZK | 48  | 31-60   | MWJ       | 3WJ     | Moderate  |
| 6HAG | 43  | 31-60   | HP+PK     |         | Moderate  |
| 6N5K | 125 | 121-150 | MWJ+PK    | 3WJ     | Difficult |
| 6N5N | 125 | 121-150 | MWJ+PK    | 3WJ     | Difficult |
| 6N5O | 126 | 121-150 | MWJ+PK    | 3WJ     | Difficult |
| 6N5P | 127 | 121-150 | MWJ+PK    | 3WJ     | Difficult |
| 6N5Q | 128 | 121-150 | MWJ+PK    | 3WJ     | Difficult |
| 6N5S | 123 | 121-150 | MWJ+PK    | 3WJ     | Difficult |
| 6N5T | 126 | 121-150 | MWJ+PK    | 3WJ     | Difficult |
| 6P2H | 69  | 61-90   | MWJ+PK    | 4WJ     | Difficult |
| 6SVS | 77  | 61-90   | HP+PK     |         | Moderate  |
| 6VMY | 148 | 121-150 | MWJ+PK    | 4WJ+3WJ | Difficult |
| 6XB7 | 41  | 31-60   | Simple HP |         | Simple    |
| 6XKN | 101 | 91-120  | MWJ+PK    | 3WJ     | Difficult |
| 6XKO | 101 | 91-120  | MWJ+PK    | 3WJ     | Difficult |
| 7D7W | 51  | 31-60   | HP+PK     |         | Moderate  |
| 7EOG | 48  | 31-60   | Simple HP |         | Simple    |
| 7KVT | 83  | 61-90   | MWJ+PK    | 3WJ     | Difficult |
| 7MKT | 23  | 1-30    | G4        |         | Difficult |
| 7MKY | 66  | 61-90   | HP+PK     |         | Moderate  |
| 7OA3 | 51  | 31-60   | Simple HP |         | Simple    |
| 7RWR | 38  | 31-60   | Simple HP |         | Simple    |
| 7WI9 | 50  | 31-60   | Simple HP |         | Simple    |
| 8D2A | 33  | 31-60   | Simple HP |         | Simple    |
| 8EYU | 49  | 31-60   | HP+G4     |         | Difficult |

|      |    |       |           |  |          |
|------|----|-------|-----------|--|----------|
| 8FB3 | 34 | 31-60 | HP+PK     |  | Moderate |
| 8HB8 | 55 | 31-60 | HP+PK     |  | Moderate |
| 8HBA | 56 | 31-60 | HP+PK     |  | Moderate |
| 8I43 | 19 | 1-30  | Simple HP |  | Simple   |
| 8I44 | 19 | 1-30  | Simple HP |  | Simple   |
| 8I45 | 19 | 1-30  | Simple HP |  | Simple   |
| 8I46 | 19 | 1-30  | Simple HP |  | Simple   |

\*HP, PK, MWJ and G4 stand for hairpins, pseudoknots, multi-way junctions and G-quadruplexes, respectively.

†3WJ, 4WJ and 5WJ stands for three-way, four-way and five-way junctions, respectively.

**Supplementary Table S2: Blind datasets 1 (B1) and 2 (B2) of RNA structures for benchmarking.**

| PDB ID | Length | Length range | Structure Class* | Type of MWJ <sup>†</sup> | Class     | Datasets <sup>‡</sup> |
|--------|--------|--------------|------------------|--------------------------|-----------|-----------------------|
| 7EOG   | 48     | 31-60        | Simple HP        |                          | Simple    | B2                    |
| 7MKT   | 23     | 1-30         | G4               |                          | Difficult | B1, B2                |
| 7RWR   | 38     | 31-60        | Simple HP        |                          | Simple    | B2                    |
| 7V9E   | 68     | 31-60        | MWJ              | 3WJ                      | Difficult | B2                    |
| 7WI9   | 50     | 31-60        | Simple HP        |                          | Simple    | B1, B2                |
| 8EYU   | 49     | 31-60        | HP+G4            |                          | Difficult | B1, B2                |
| 8F0N   | 49     | 31-60        | HP+G4            |                          | Difficult | B2                    |
| 8FB3   | 34     | 31-60        | HP+PK            |                          | Moderate  | B1, B2                |
| 8FZA   | 30     | 1-30         | HP+PK            |                          | Moderate  | B1, B2                |
| 8HB8   | 55     | 31-60        | HP+PK            |                          | Moderate  | B1, B2                |
| 8I43   | 19     | 1-30         | Simple HP        |                          | Simple    | B1, B2                |

\*HP, PK, MWJ and G4 stand for hairpins, pseudoknots, multi-way junctions and G-quadruplexes, respectively.

<sup>†</sup>3WJ stands for three-way junctions, respectively.

<sup>‡</sup>Indicates the presence of the PDB ID in the blind sets B1 and B2.

**Supplementary Table S3: Run time for selected RNAs of different lengths.**

| PDB ID     | Length | No of CPUs | Run Time (in seconds)* |
|------------|--------|------------|------------------------|
| RhoFold    |        |            |                        |
| 1AJU       | 30     | 32         | 1784.433               |
| 2MIY       | 59     | 32         | 4052.317               |
| 4LVV       | 89     | 32         | 6434.864               |
| 6CK4       | 117    | 32         | 6938.916               |
| 6VMY       | 148    | 32         | 37196.180              |
| 3DIG       | 174    | 32         | 8537.104               |
| 4GMA       | 210    | 32         | 70812.830              |
| BRIQ       |        |            |                        |
| 1AJU       | 30     | 1          | 527.082                |
| 2MIY       | 59     | 1          | 2572.98                |
| 4LVV       | 89     | 1          | 5681.28                |
| 6CK4       | 117    | 1          | 10499.8                |
| 6VMY       | 148    | 1          | 21467                  |
| 3DIG       | 174    | 1          | 26398.6                |
| 4GMA       | 210    | 1          | 60281.2                |
| FARFAR2    |        |            |                        |
| 1AJU       | 30     | 1          | 4930                   |
| 2MIY       | 59     | 1          | 17976                  |
| 4LVV       | 89     | 1          | 54300                  |
| 6CK4       | 117    | 1          | 57470                  |
| 6VMY       | 148    | 1          | 145241                 |
| 3DIG       | 174    | 1          | 131948                 |
| 4GMA       | 210    | 1          | 194990                 |
| FARFAR2_ss |        |            |                        |
| 1AJU       | 30     | 1          | 17,695                 |
| 2MIY       | 59     | 1          | 24,576                 |
| 4LVV       | 89     | 1          | 91274                  |
| 6CK4       | 117    | 1          | 40029                  |
| 6VMY       | 148    | 1          | 162503                 |
| 3DIG       | 174    | 1          | 200086                 |
| 4GMA       | 210    | 1          | 199317                 |
| SimRNA     |        |            |                        |
| 1AJU       | 30     | 80         | 57257.210              |
| 2MIY       | 59     | 80         | 133566.612             |
| 4LVV       | 89     | 80         | 213615.481             |
| 6CK4       | 117    | 80         | 276932.503             |
| 6VMY       | 148    | 80         | 391330.501             |
| 3DIG       | 174    | 80         | 445124.257             |
| 4GMA       | 210    | 80         | 543073.527             |
| SimRNA_ss  |        |            |                        |
| 1AJU       | 30     | 80         | 60383.902              |
| 2MIY       | 59     | 80         | 140421.915             |

|      |     |    |            |
|------|-----|----|------------|
| 4LVV | 89  | 80 | 251122.690 |
| 6CK4 | 117 | 80 | 304637.303 |
| 6VMY | 148 | 80 | 394999.842 |
| 3DIG | 174 | 80 | 505577.885 |
| 4GMA | 210 | 80 | 574832.954 |

\*The running time information is missing for DeepFoldRNA and Vfold2 simulations are missing as we couldn't estimate it from the log files for these programs.



**Supplementary Table S4: Correlation of Interface RMSD with RMSD Values and TM Scores.**

| Method                  | RMSD         |          | TM*          |          |
|-------------------------|--------------|----------|--------------|----------|
|                         | Correlation‡ | p-value‡ | Correlation‡ | p-value‡ |
| I-RMSD (entire dataset) |              |          |              |          |
| DeepFoldRNA             | 0.80         | 2.16E-32 | -0.33        | 2.82E-03 |
| RhoFold                 | 0.78         | 6.73E-29 | -0.06        | 5.70E-01 |
| BRIQ                    | 0.80         | 5.03E-32 | -0.35        | 1.82E-03 |
| FARFAR2                 | 0.82         | 3.53E-35 | -0.39        | 3.95E-04 |
| FARFAR2_ss              | 0.81         | 6.35E-34 | -0.64        | 3.11E-10 |
| SimRNA                  | 0.87         | 5.70E-44 | -0.54        | 2.60E-07 |
| SimRNA_ss               | 0.78         | 8.92E-30 | -0.42        | 1.08E-04 |
| Vfold2                  | 0.92         | 5.43E-35 | -0.82        | 1.17E-11 |
| Vfold2_ss               | 0.92         | 3.31E-50 | -0.84        | 3.62E-18 |
| I-RMSD (<=2.5 Å)†       |              |          |              |          |
| DeepFoldRNA             | -0.17        | 1.80E-01 | 0.33         | 3.06E-02 |
| RhoFold                 | 0.03         | 8.69E-01 | 0.22         | 3.34E-01 |
| BRIQ                    | -0.77        | 2.50E-02 | —            | —        |
| FARFAR2                 | 0.49         | 3.29E-01 | —            | —        |
| FARFAR2_ss              | -0.27        | 1.98E-01 | 0.33         | 3.44E-01 |
| SimRNA                  | -0.37        | 2.37E-01 | —            | —        |
| SimRNA_ss               | -0.19        | 5.41E-01 | —            | —        |
| Vfold2                  | -0.43        | 9.14E-03 | 0.23         | 2.90E-01 |
| Vfold2_ss               | 0.62         | 7.74E-06 | -0.54        | 8.48E-02 |

\*The TM values for RNAs with length  $\geq 60$  nucleotides are included in the calculations.

‡The correlation coefficients and the statistical significance (p-values from a two-tailed t-test).

†The values were not calculated when the number of points were insufficient to calculate the correlations and are denoted by '—' in the table.

### Supplementary Figure S1:

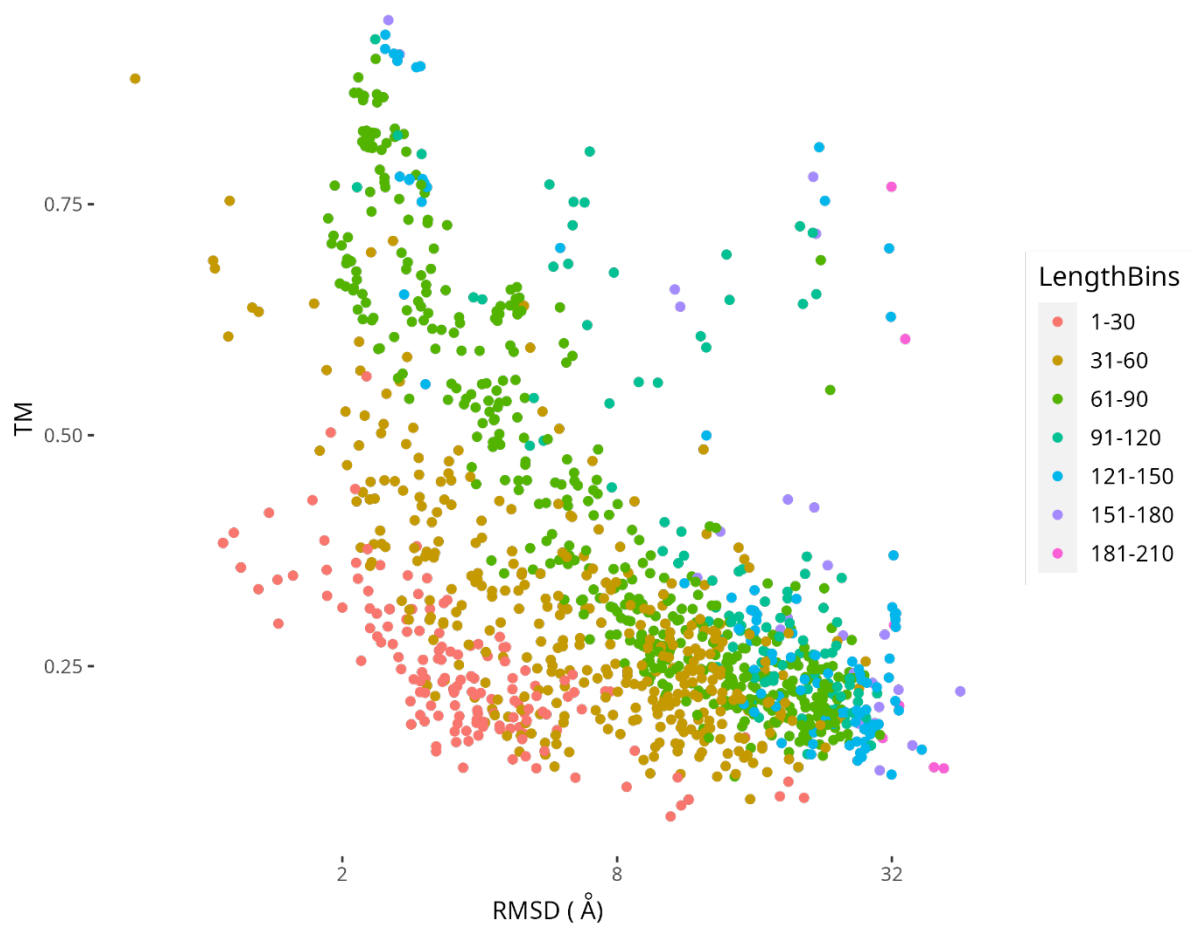

**Figure S1: RMSD vs TM score.** The points colored based on length of RNA with each color representing a 30-nucleotide length bin. The TM values for RNA molecules up to a length of 60 nucleotides are unreliable.

**Supplementary Figure S2:**

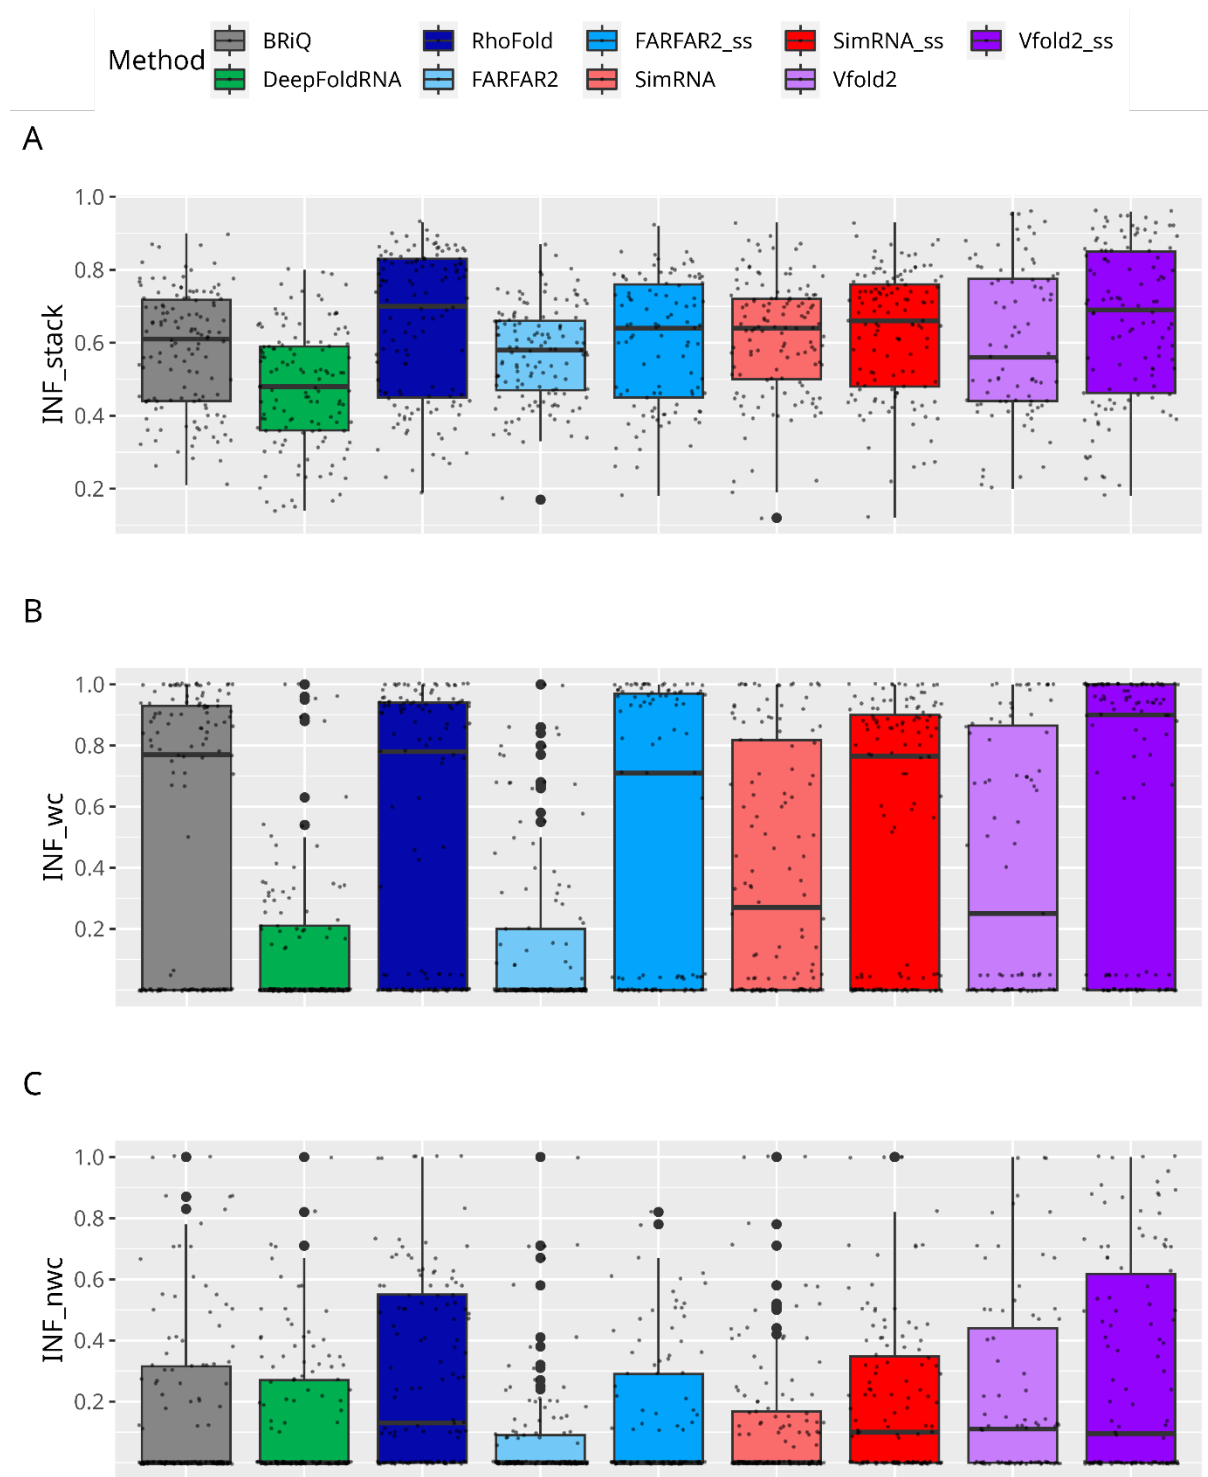

**Figure S2: INF measures for overall dataset:** (A) INF<sub>stack</sub>, (B) INF<sub>wc</sub>, and (C) INF<sub>nwc</sub>. Each method is represented by a unique color. Models generated without secondary structure restraints are shown in lighter shades, while those with restraints are in darker shades of the same color.

### Supplementary Figure S3:

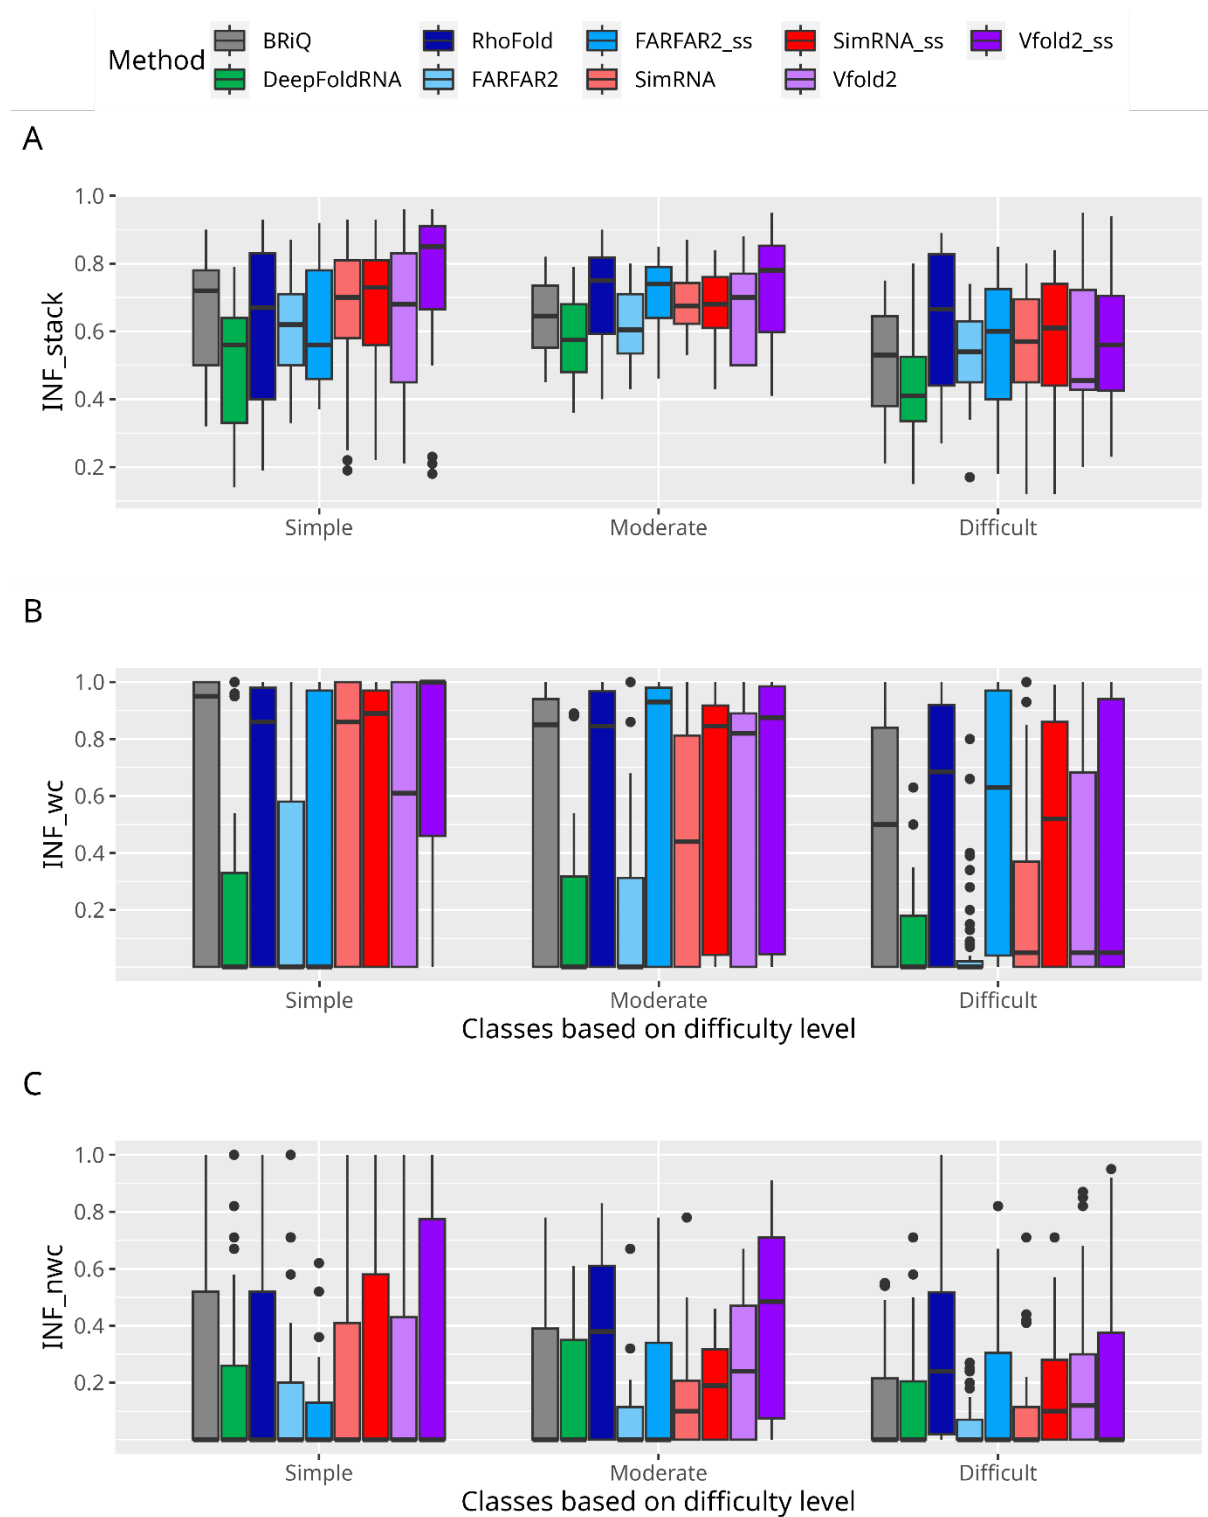

**Figure S3: INF measures across different difficulty classes:** (A) INF<sub>stack</sub>, (B) INF<sub>wc</sub>, and (C) INF<sub>nwc</sub>. Each method is represented by a unique color. Models generated without secondary structure restraints are shown in lighter shades, while those with restraints are in darker shades of the same color.

### Supplementary Figure S4:

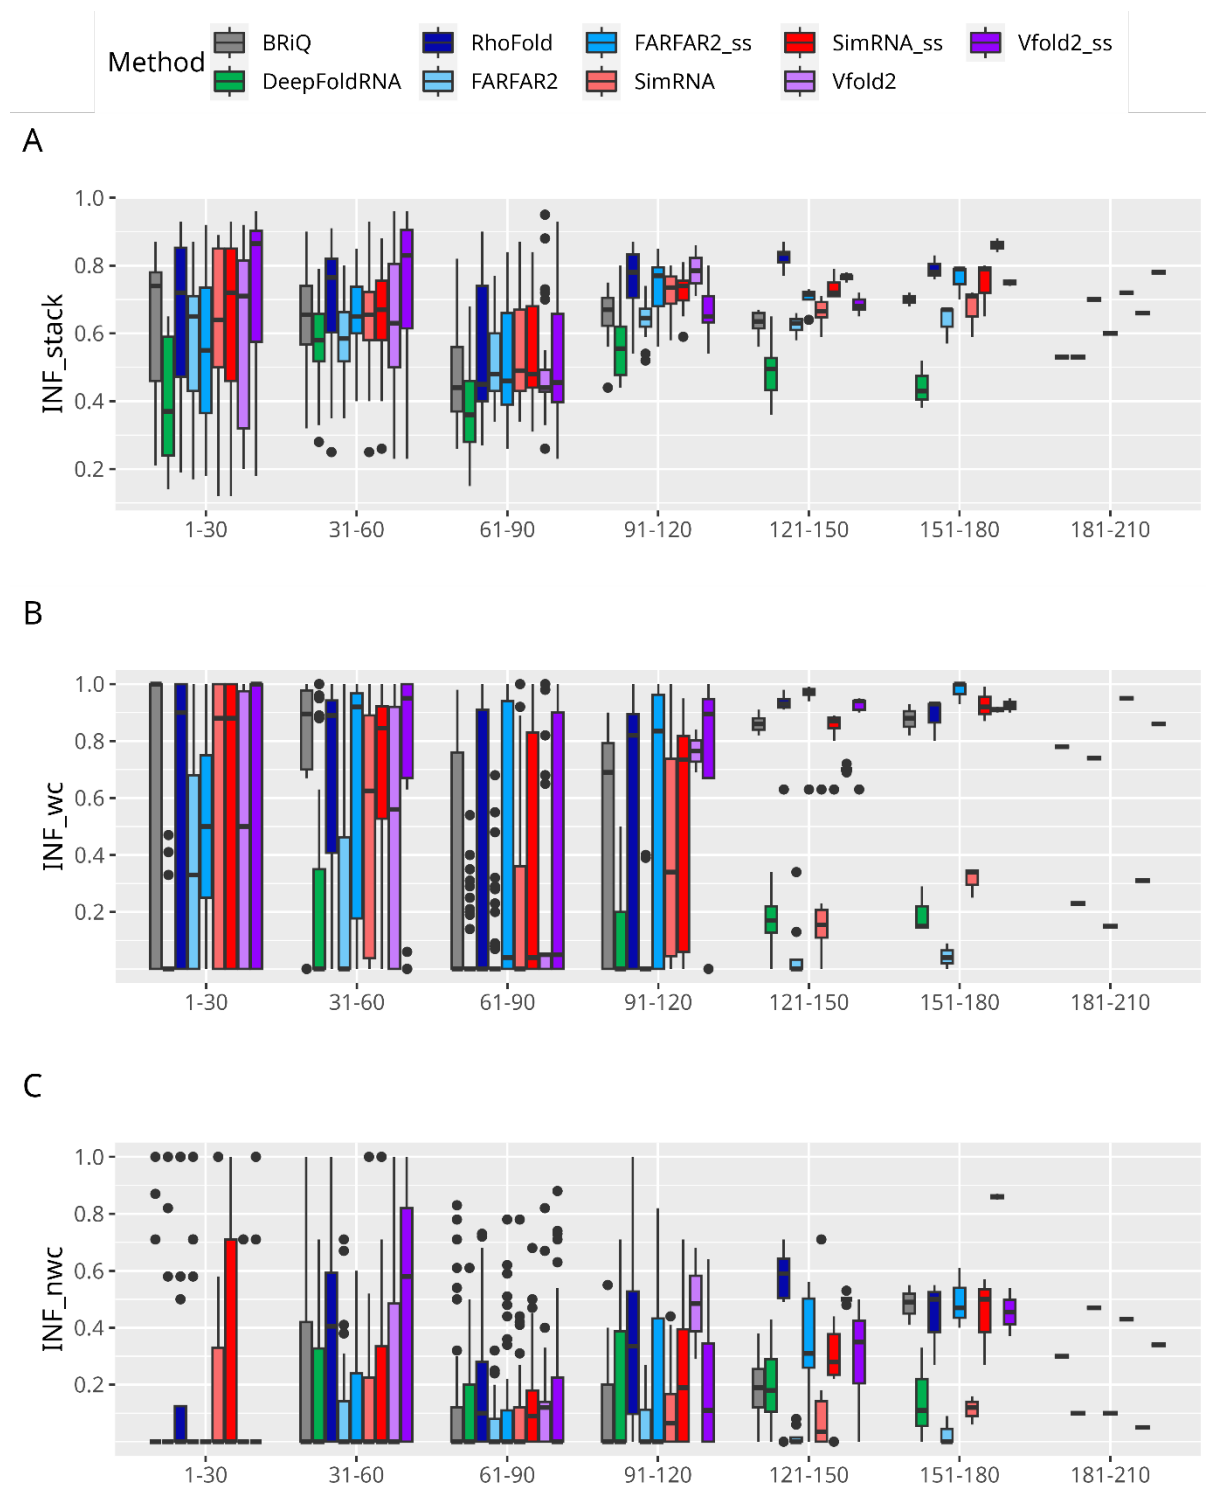

**Figure S4: INF measures across different lengths of RNAs.** (A) INF<sub>stack</sub>, (B) INF<sub>wc</sub>, and (C) INF<sub>nwc</sub> are organized into sets of box plots representing 30-nucleotide length bins. Each method is represented by a unique color. Models generated without secondary structure restraints are shown in lighter shades, while those with restraints are in darker shades of the same color.

### Supplementary Figure S5:

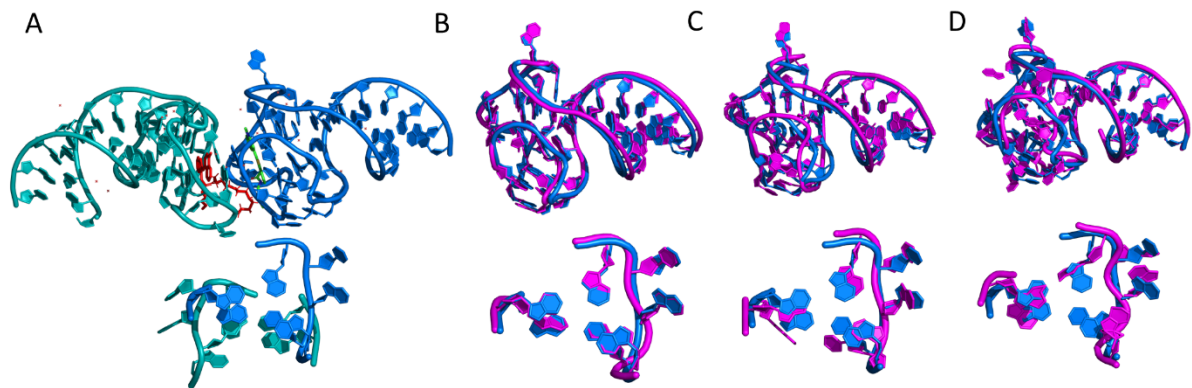

**Figure S5: Example of modeling the G4 element within a hairpin (HP) structure.**

(A) The XRD structure of iMango-III aptamer features two chains in the asymmetric unit colored in teal and marine (PDB ID: 6E8S). The biologically relevant assembly includes only one RNA chain with a length of 38 nucleotides and was modeled with all methods. Only three methods were able to model the G4 part of the structure and their superpositions to native structures are shown here. For these models, each panel displays two images: the upper image showing the superpositions of models (magenta) to the native structure (marine), and the lower image highlighting the superpositions of corresponding ligand binding regions. (B) Vfold2 fails to accurately model this structure, however, the Vfold2\_ss accurately predicts the RNA (RMSD = 1.05 Å, INF\_all = 0.93, INF\_stack = 0.92, INF\_wc = 1, and INF\_nwc = 0.92). The ligand binding region which involves the G4 is well-modeled by Vfold2\_ss, showing minimal deviation from the reference structure (I-RMSD = 0.99 Å). (C) The RhoFold model is less accurate than Vfold2\_ss (RMSD = 2.03 Å, INF\_all = 0.77, INF\_stack = 0.83, INF\_wc = 0.94, and INF\_nwc = 0.42). The local binding site also shows larger deviation than Vfold2\_ss (I-RMSD = 2.14 Å). (D) The DeepFoldRNA model exhibits certain limitations in accurately capturing the structure's complexity (RMSD = 2.77 Å, INF\_all = 0.58, INF\_stack = 0.36, INF\_wc = 0.43, and INF\_nwc = 0.35). The deviation in binding site prediction is highest among the three models (I-RMSD = 3.35 Å). This underscores the complexities inherent in accurately predicting RNA structures with G4 elements. While Vfold2\_ss demonstrates notable success, both RhoFold and DeepFoldRNA exhibit varying degrees of challenges, particularly in capturing the intricate non-Watson-Crick interactions and local binding site conformations.

## Supplementary Figure S6:

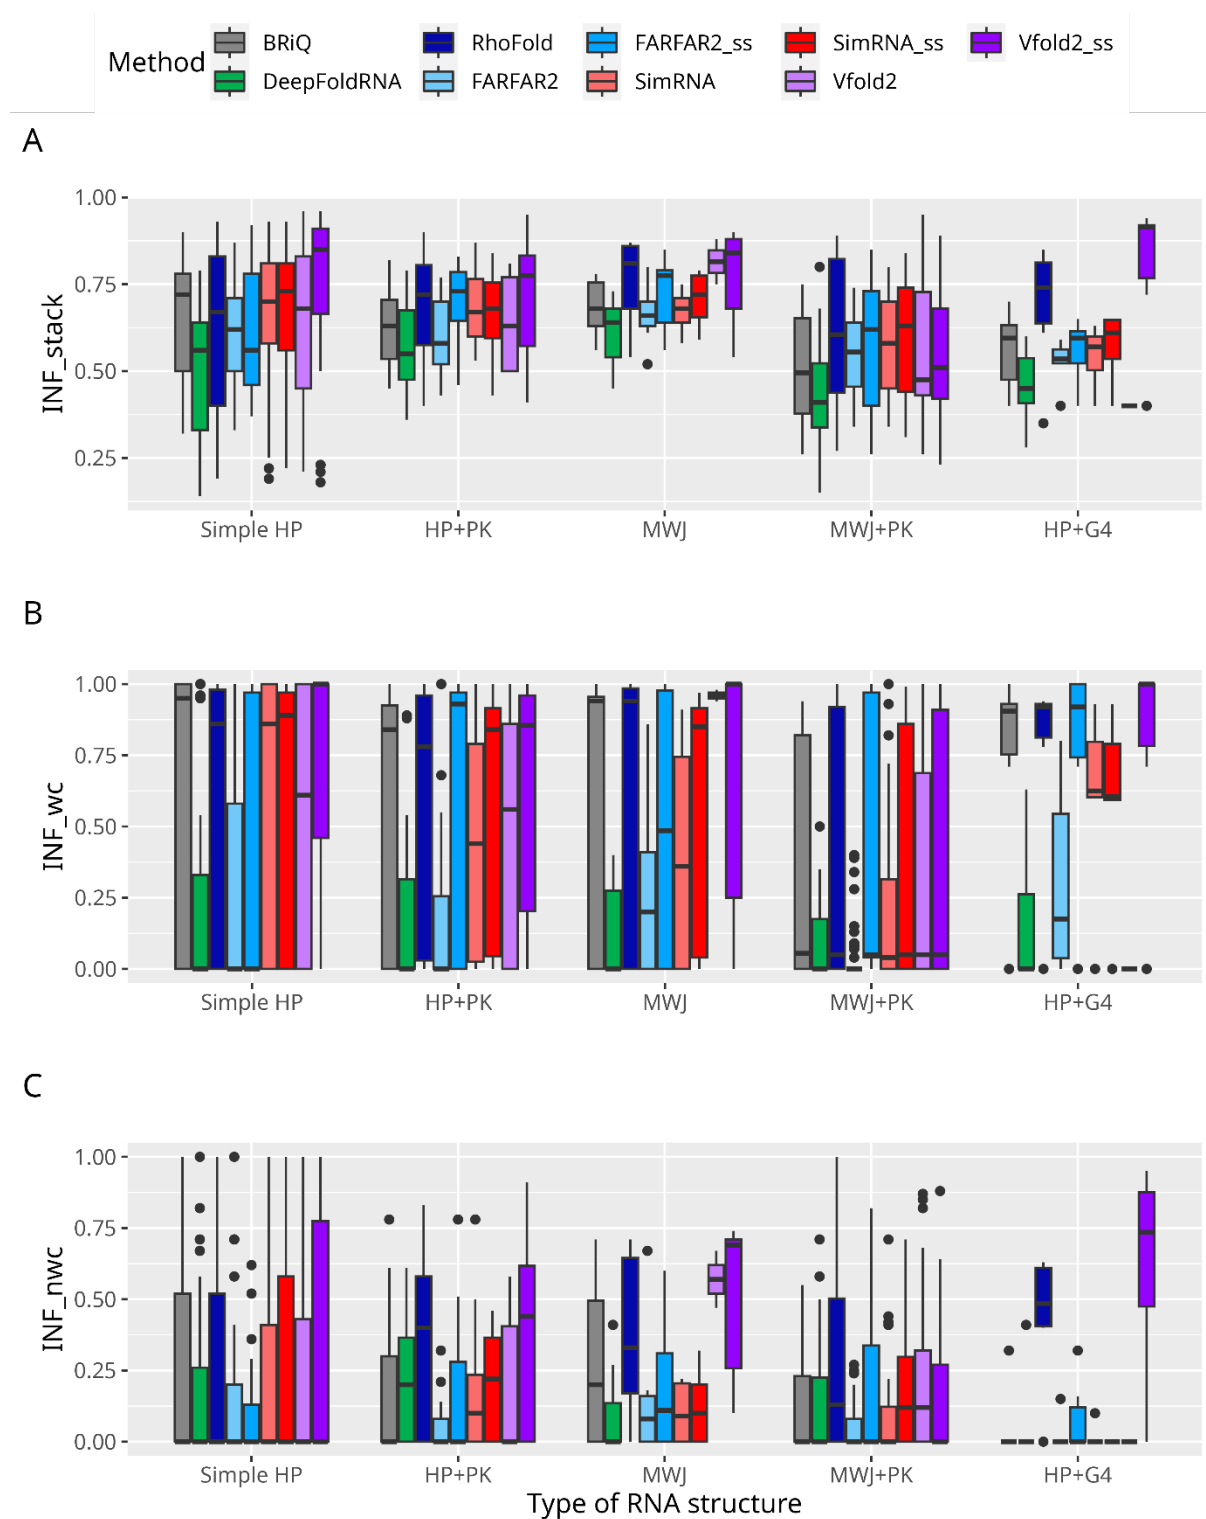

**Figure S6: INF measures across different structural classes:** (A) INF<sub>stack</sub>, (B) INF<sub>wc</sub>, and (C) INF<sub>nwc</sub>. HP, PK, MWJ and G4 stand for hairpins, pseudoknots, multi-way junctions and G-quadruplexes, respectively. Each method is represented by a unique color. Models generated without secondary structure restraints are shown in lighter shades, while those with restraints are in darker shades of the same color.

## Supplementary Figure S7:

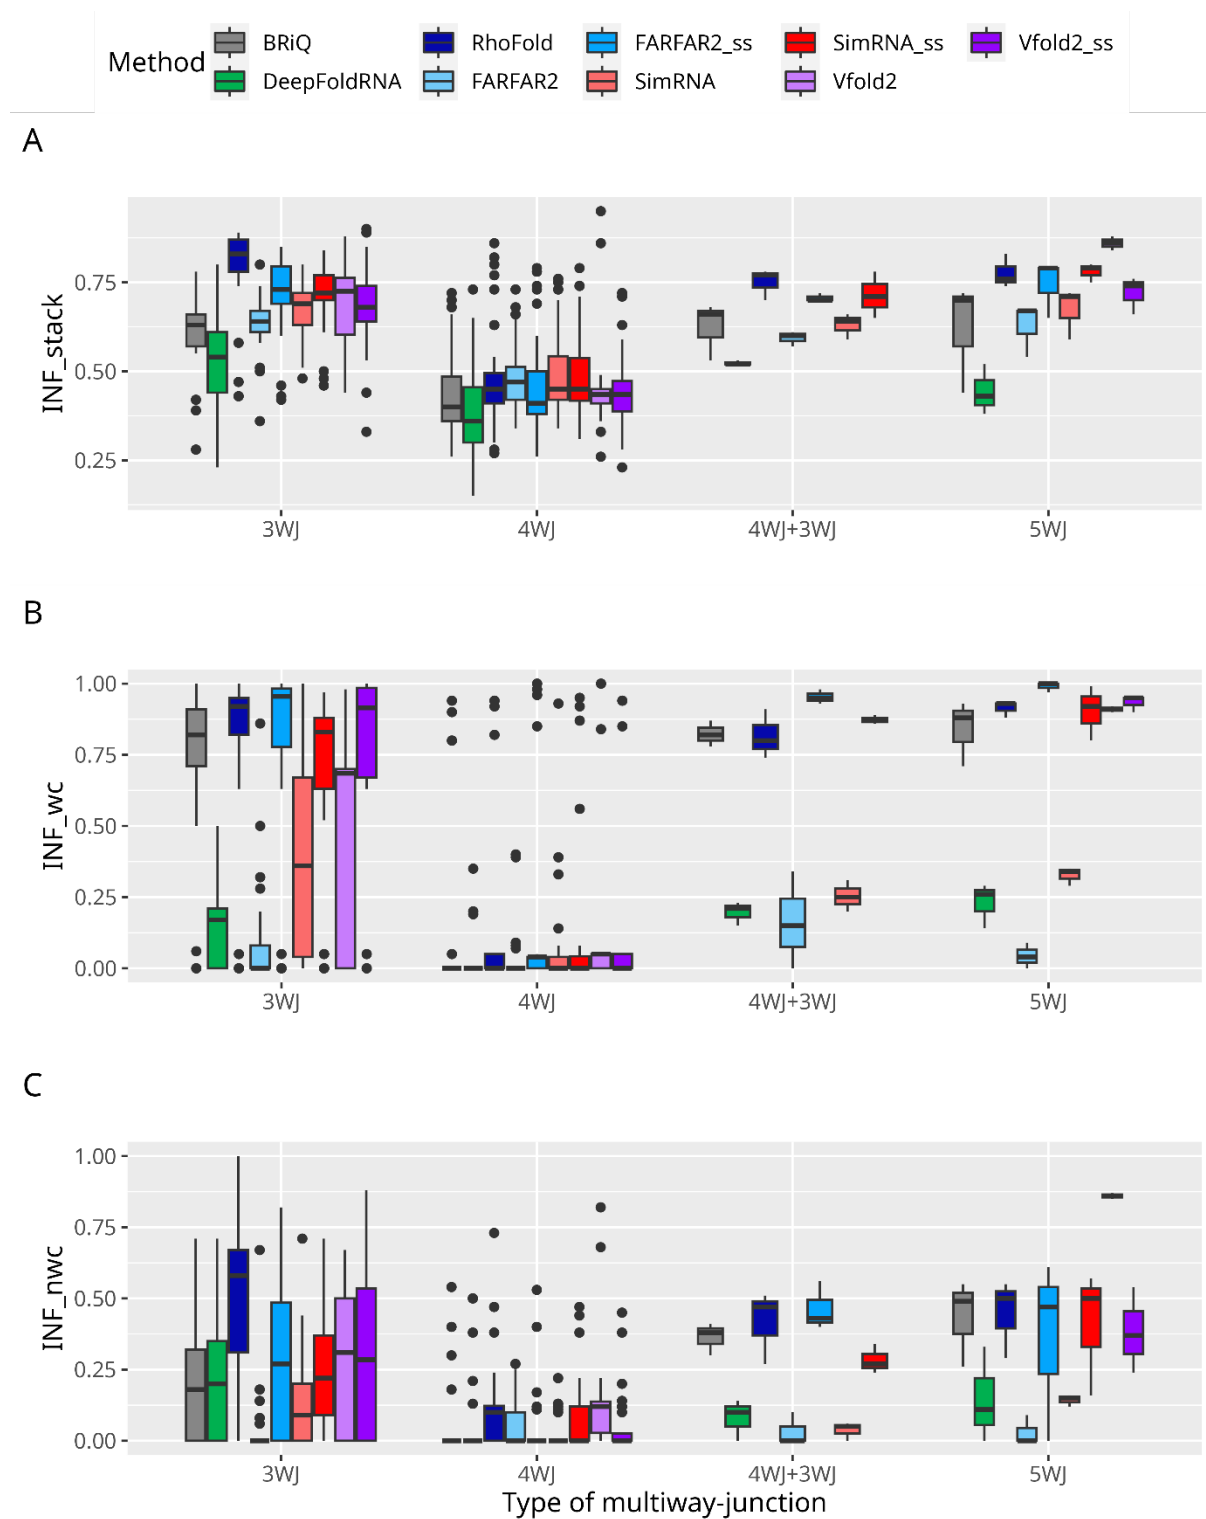

**Figure S7: INF measures across different multiway junctions:** (A) INF\_stack, (B) INF\_wc, and (C) INF\_nwc. 3WJ, 4WJ and 5WJ stands for three-way, four-way and five-way junctions, respectively. Each method is represented by a unique color. Models generated without secondary structure restraints are shown in lighter shades, while those with restraints are in darker shades of the same color.



## Supplementary Figure S8:

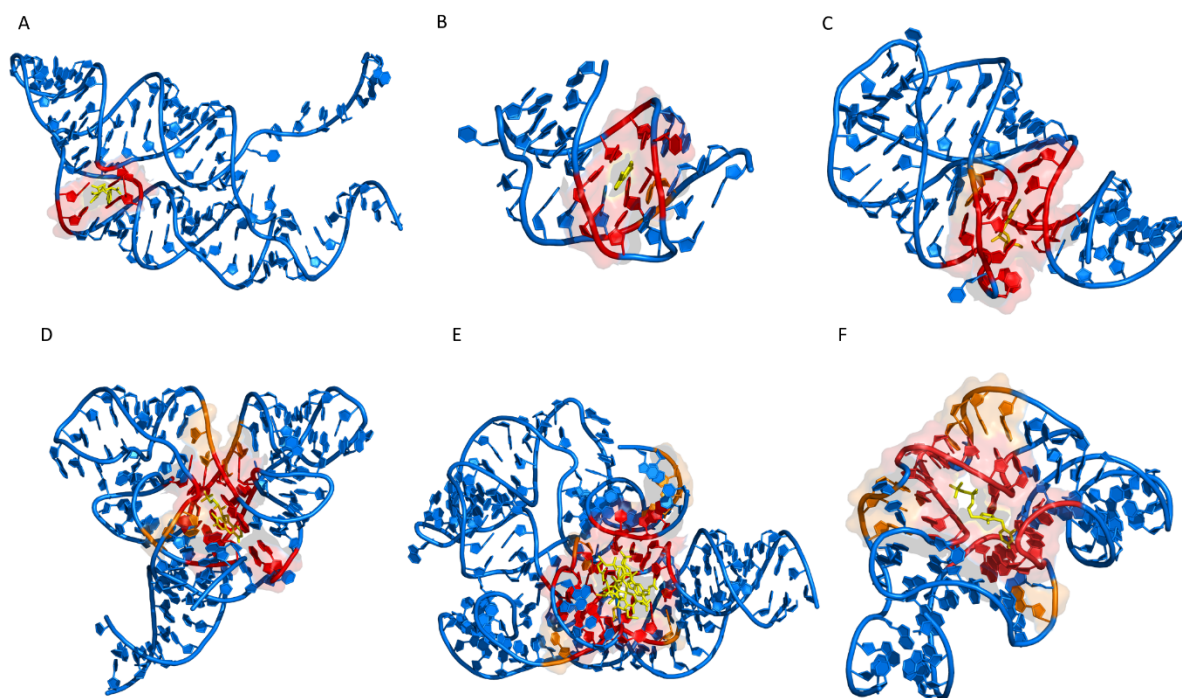

**Figure S8: RNA-Ligand complexes with varying interface sizes.** (A) THF riboswitch RNA bound to 5-formyl-THF (PDB ID: 3SUH), (B) preQ1 riboswitch bound to its precursor metabolite (PDB ID: 3GCA), (C) the 2'-deoxyguanosine (dG) riboswitch bound to guanosine (PDB ID: 3SKZ), (D) Flavin mononucleotide (FMN) riboswitch bound to FMN (PDB ID: 3F2Q), (E) adenosylcobalamin (AdoCbl) riboswitch bound to AdoCbl (PDB ID: 4GXY), and (F) thiamine pyrophosphate (TPP) riboswitch bound to TPP (PDB ID: 2GDI), with binding interfaces of 5, 9, 15, 21, 26, and 27 nucleotides, respectively. Binding residues are colored in red and residues base-pairing with the binding residues are in orange, both shown using both surface and cartoon representations. The remainder of the RNA is visualized exclusively in cartoon representation and colored in marine. Ligands are colored yellow.

## Supplementary Figure S9:

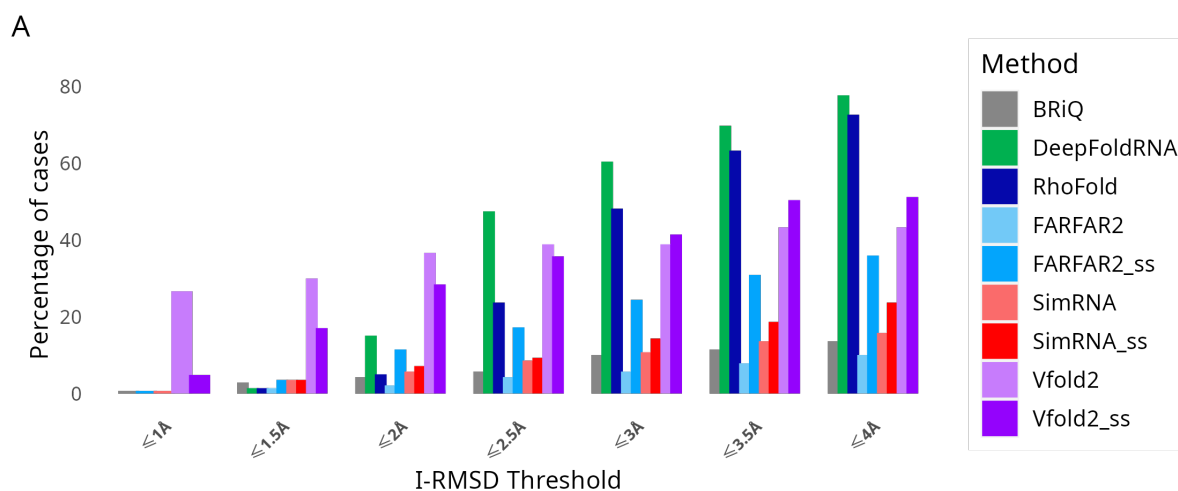

**Figure S9: Interface RMSDs.** (A) Percentage of successful modeling cases achieving an interface RMSD (I-RMSD) at different threshold values. Each method is represented by a unique color. Models generated without secondary structure restraints are shown in lighter shades, while those with restraints are depicted in darker shades of the same color. The dotted red line on the scatter plots marks the 2.5 Å I-RMSD.

### Supplementary Figure S10:

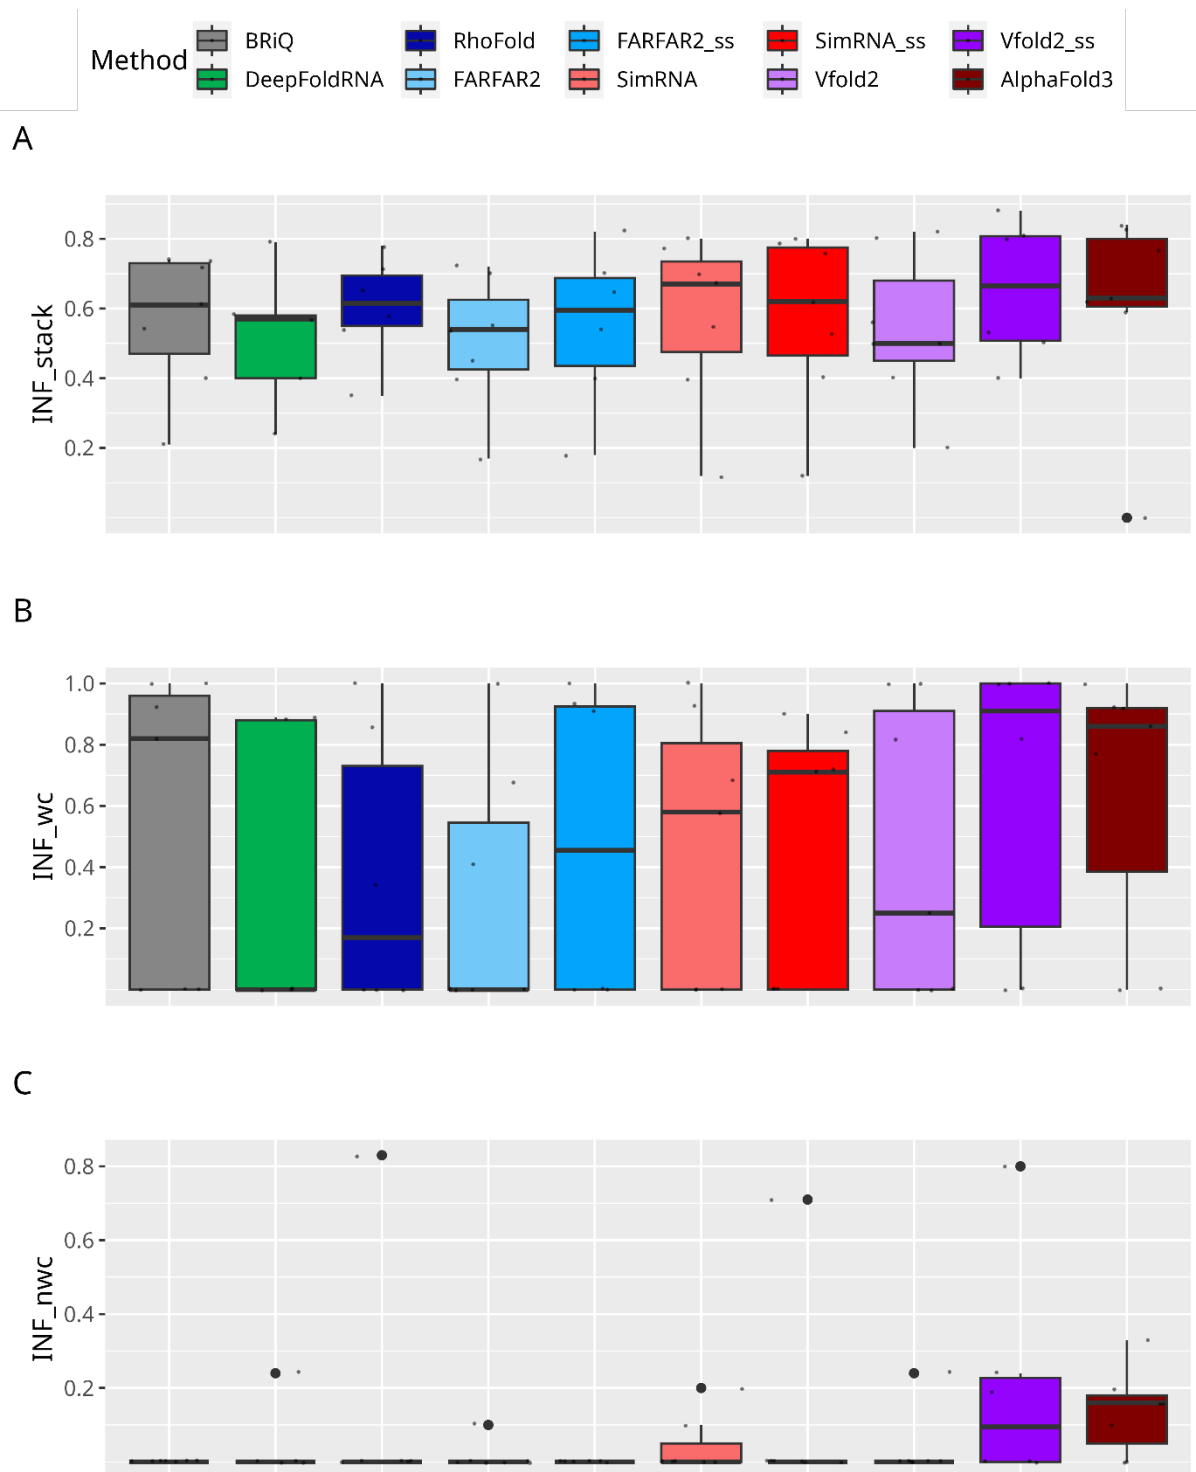

**Figure S10: INF measures for B1 dataset:** (A) INF\_stack, (B) INF\_wc, and (C) INF\_nwc. Each method is represented by a unique color. Models generated without secondary structure restraints are shown in lighter shades, while those with restraints are in darker shades of the same color.

### Supplementary Figure S11:

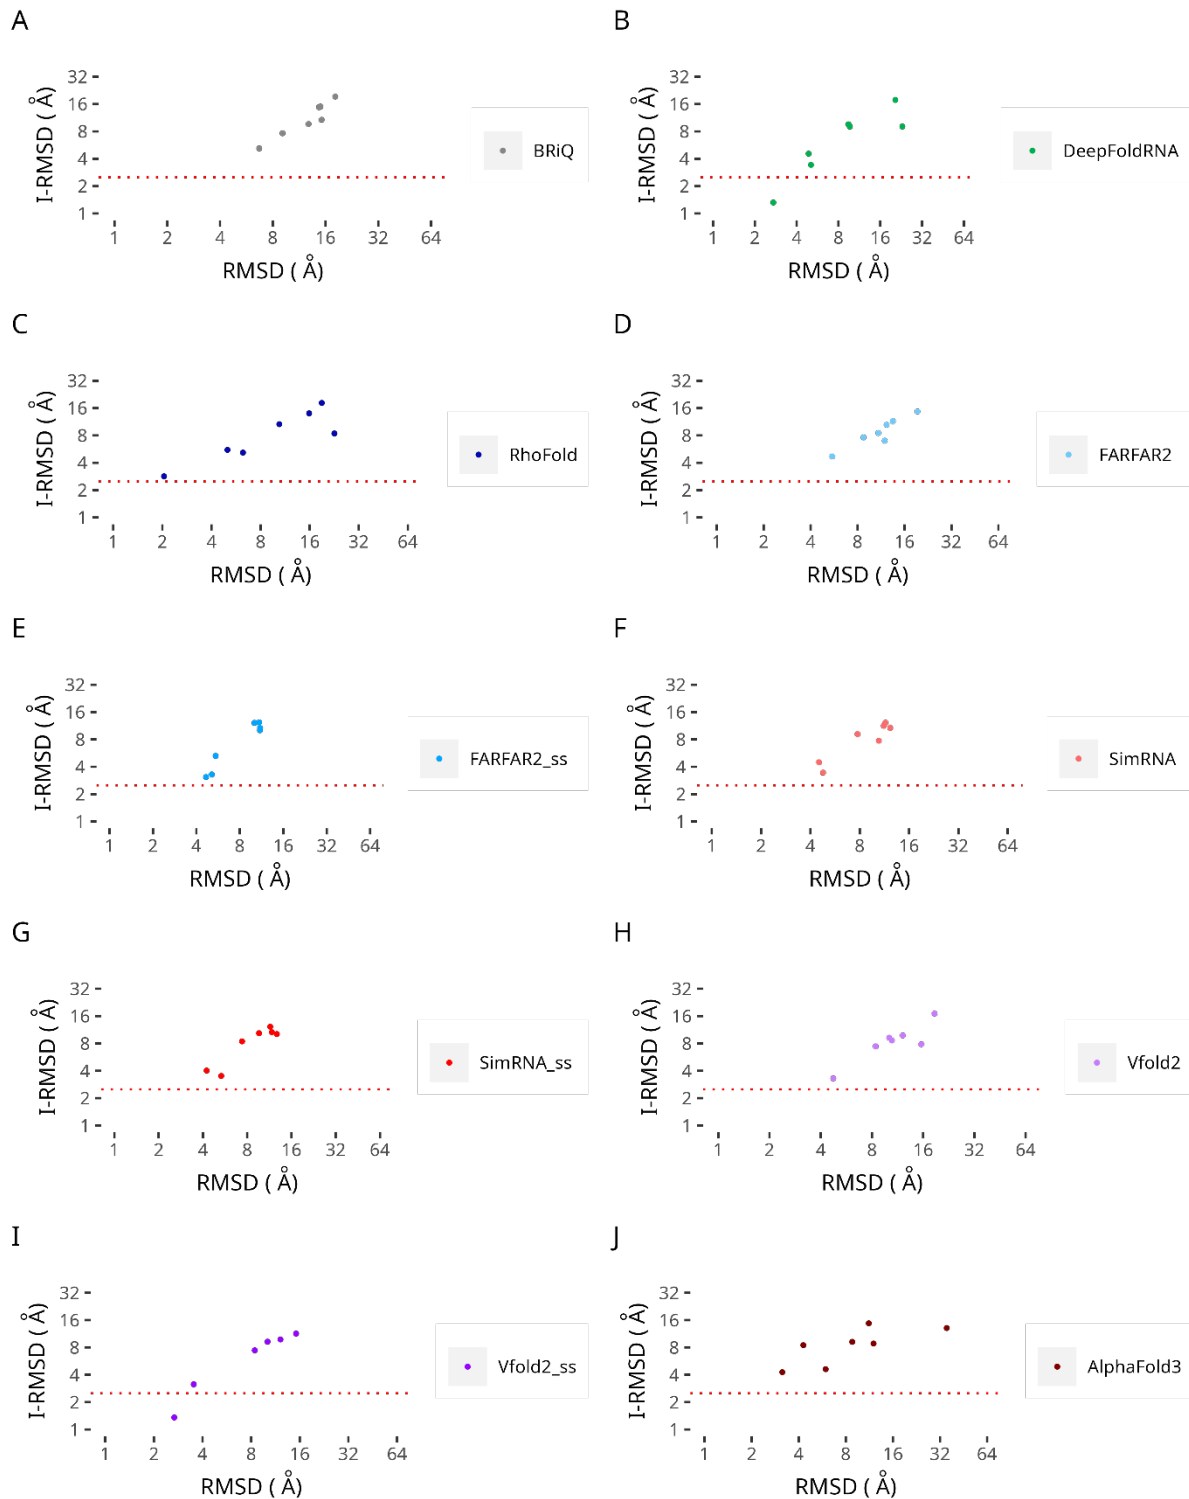

**Figure S11: Plot of I-RMSD vs RMSD for B1 dataset.** Each method is represented by a unique color in panels A-J. Models generated without secondary structure restraints are shown in lighter shades, while those with restraints are depicted in darker shades of the same color.

### Supplementary Figure S12:

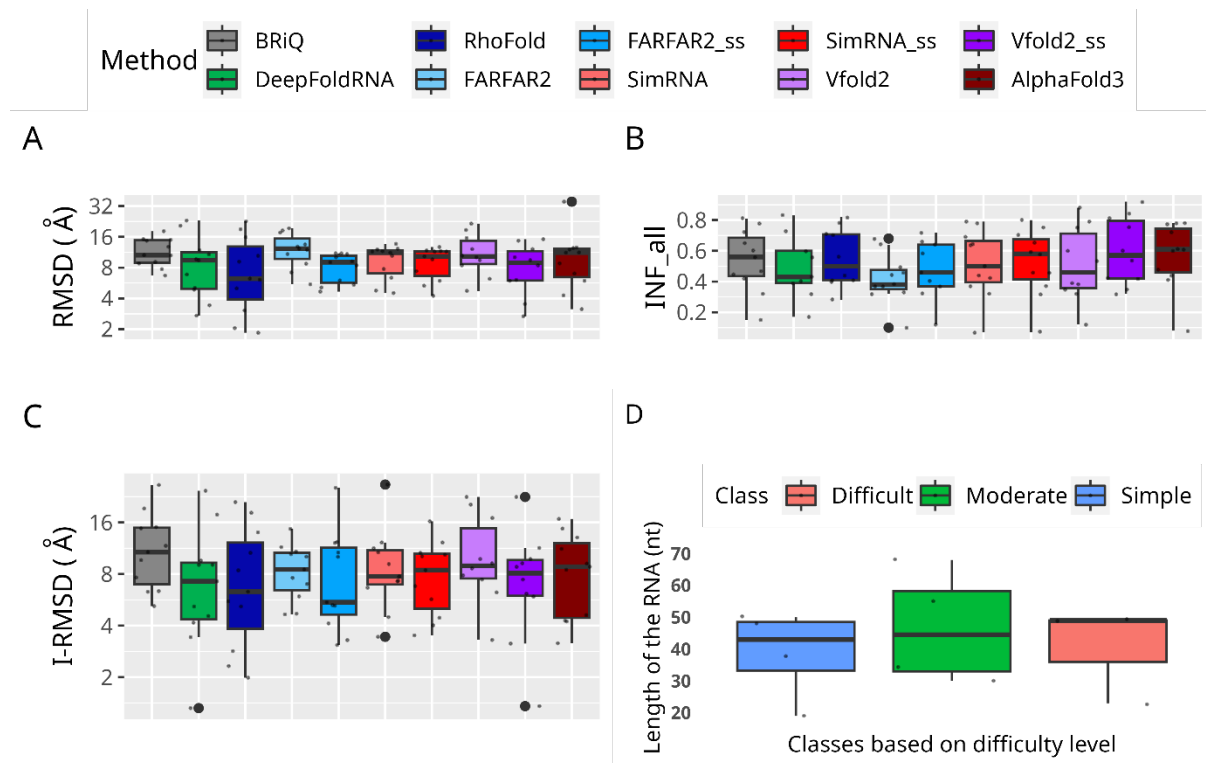

**Figure S12: Performance of 3D modeling methods on blind dataset 2 (B2) containing structures not used in training by the ML methods.** Performance measures for RNA 3D structure prediction methods are displayed across the B2 dataset: (A) RMSD and (B) INF\_all (C)I-RMSD. (D) Length distribution of RNAs on three difficulty classes of modeling - 'simple', 'moderate', and 'difficult'.

**Supplementary Figure S13:**

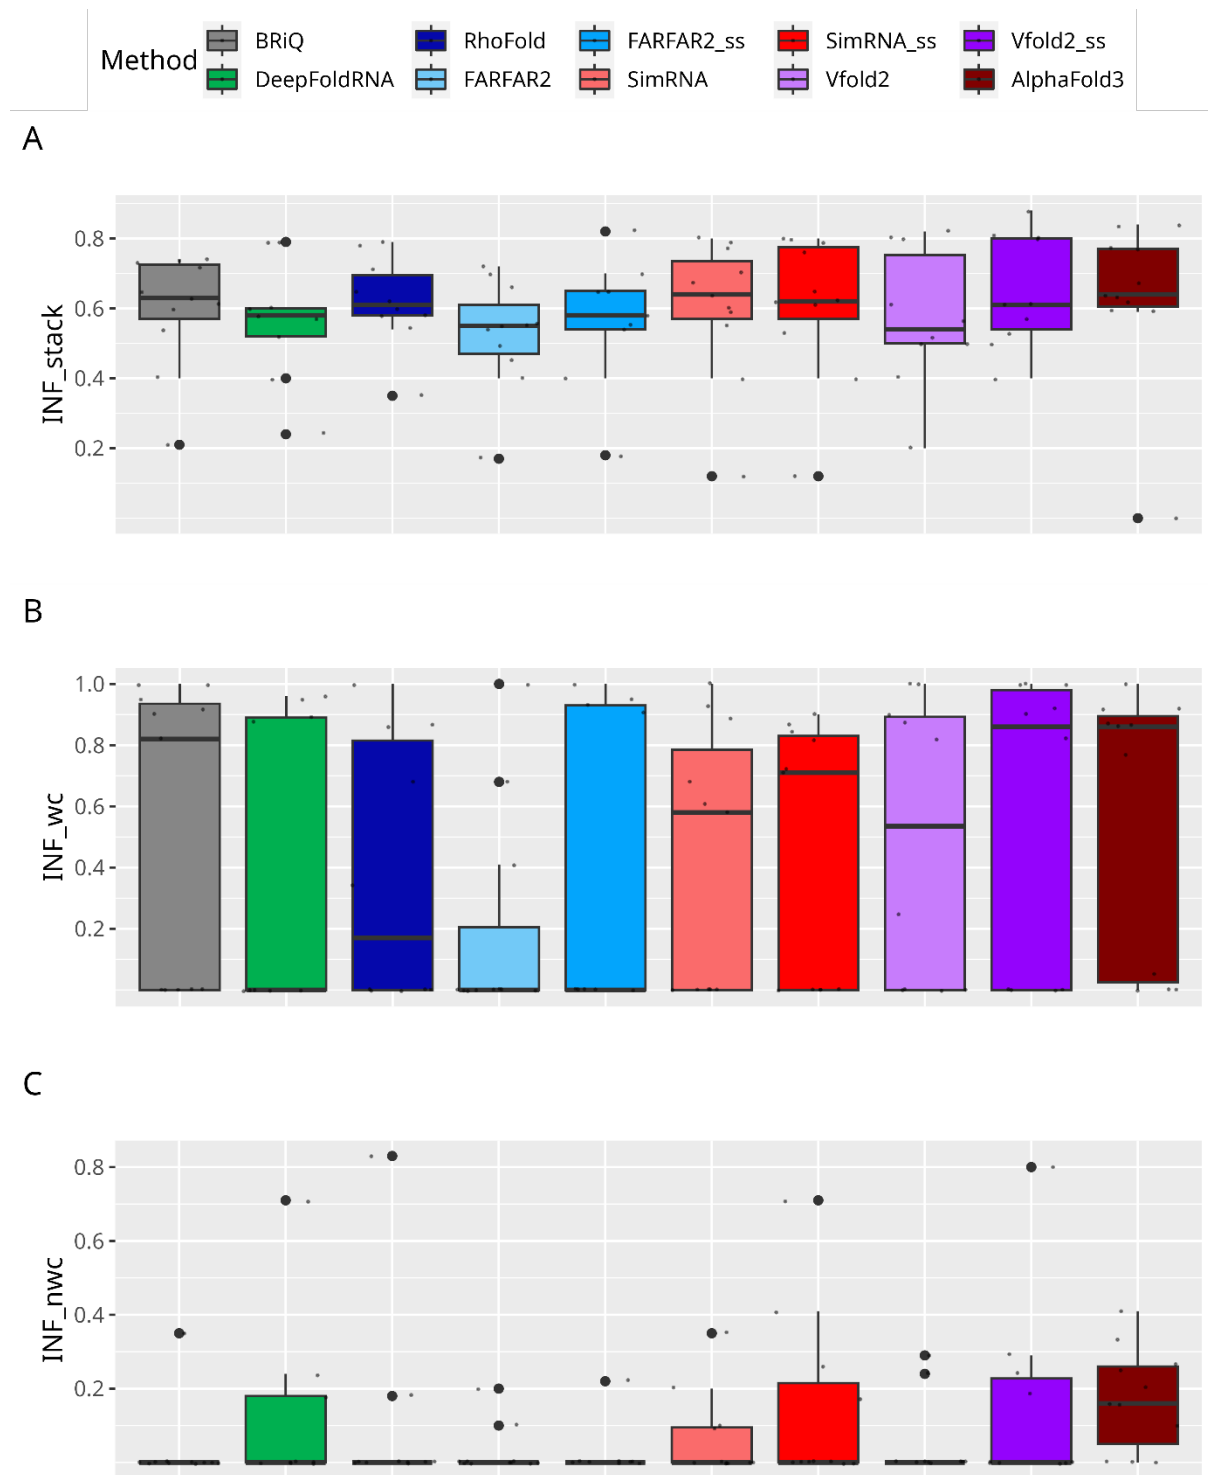

**Figure S13: INF measures for B2 dataset:** (A) INF<sub>stack</sub>, (B) INF<sub>wc</sub>, and (C) INF<sub>nwc</sub>. Each method is represented by a unique color. Models generated without secondary structure restraints are shown in lighter shades, while those with restraints are in darker shades of the same color.

### Supplementary Figure S14:

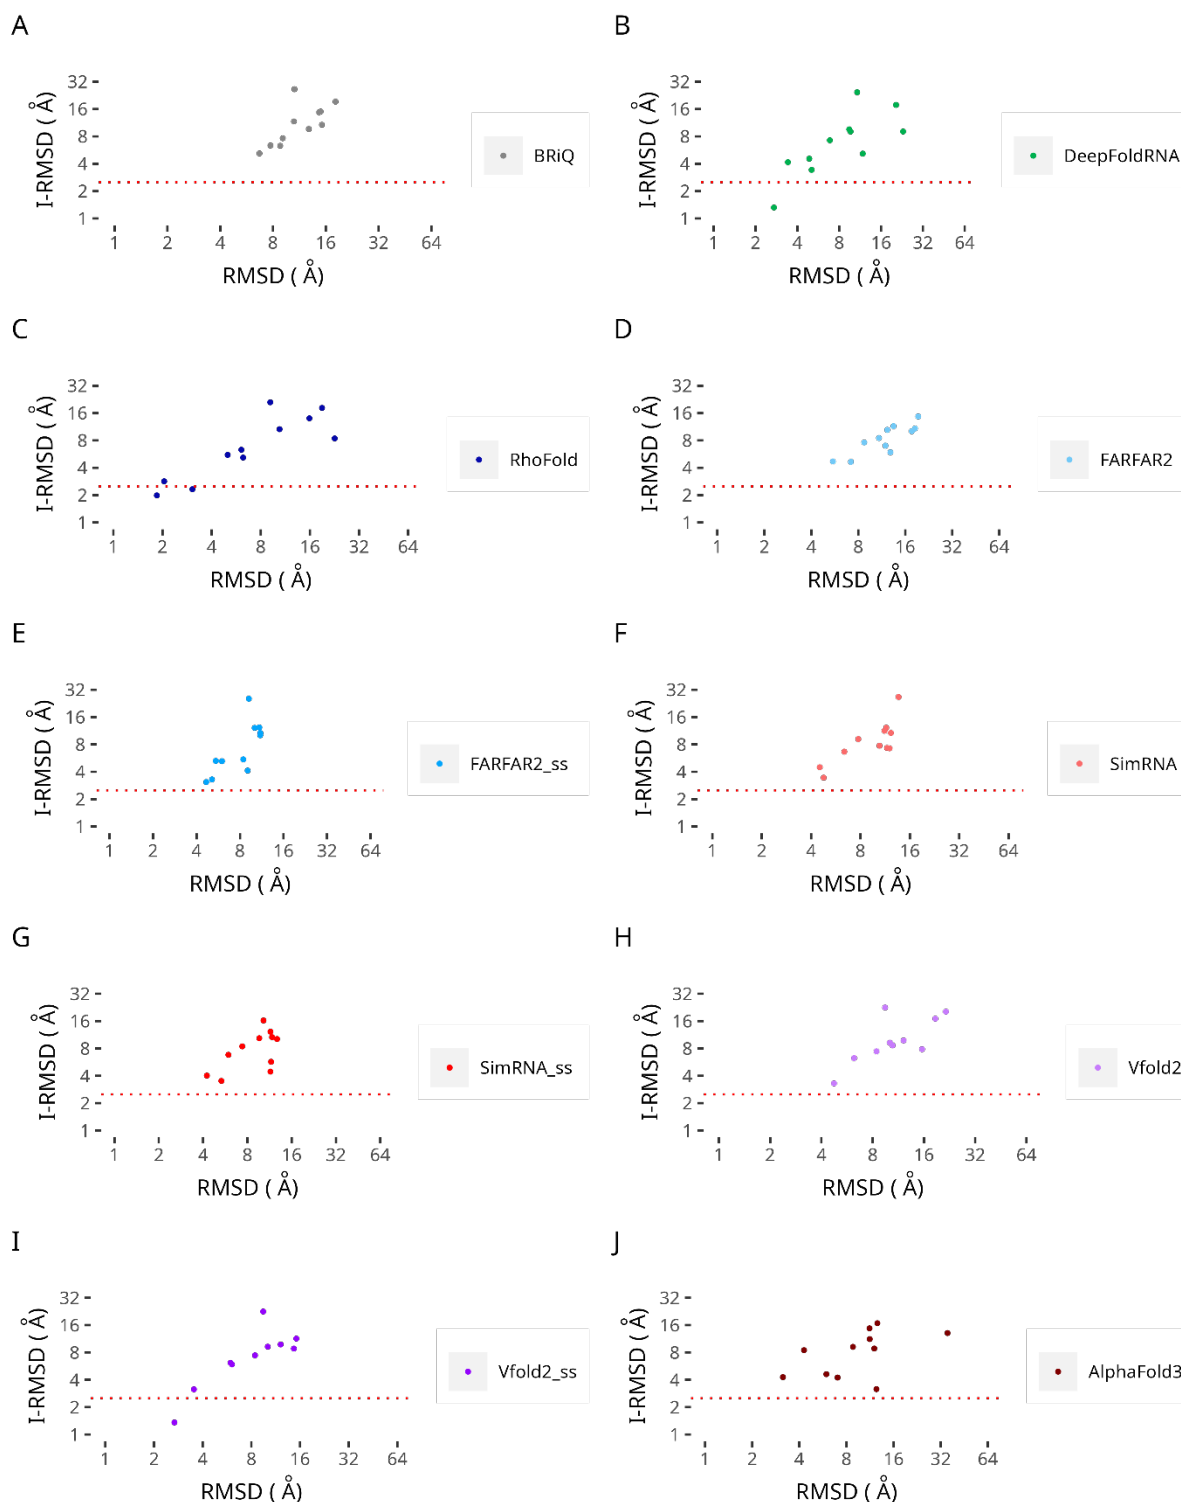

**Figure S14: Plot of I-RMSD vs RMSD for B2 dataset.** Each method is represented by a unique color in panels A-J. Models generated without secondary structure restraints are shown in lighter shades, while those with restraints are depicted in darker shades of the same color.
